# Supplementary material for: Clinico-Genomic Analysis Reveals Mutations Associated with COVID-19 Disease Severity: Possible Modulation by RNA Structure
Source: MDPI journal article supplement (doi:10.3390/pathogens10091109), 2021-08-31
Supplement: s1 [file s1]

## Mutation Association Analysis

**Table S1: List of mutations associated with disease Severity**

| Mutation  | Chi2  | pValue | Pearson Correlation | Locus      | Type of Mutation | Frequency | Severity Score |
|-----------|-------|--------|---------------------|------------|------------------|-----------|----------------|
| 26194 A T | 9.308 | 0.0023 | 0.226               | Orf3a      | T268S            | 6.633     | 0.9231         |
| 1373 C T  | 7.111 | 0.0077 | -0.211              | Orf1a      | C370R            | 18.367    | 0.2778         |
| 26111 C T | 6.400 | 0.0114 | -0.185              | Orf3a      | P240L            | 5.102     | 0.1000         |
| 25611 C A | 5.828 | 0.0158 | 0.187               | Orf3a:74   | synonymous       | 14.796    | 0.7241         |
| 631 C A   | 5.121 | 0.0236 | -0.177              | Orf1a:122  | synonymous       | 16.837    | 0.3030         |
| 6312 C A  | 5.070 | 0.0243 | -0.191              | Orf1ab     | T2016K           | 29.082    | 0.3509         |
| 10870 G T | 4.571 | 0.0325 | -0.158              | ORF1a:3535 | synonymous       | 7.143     | 0.2143         |
| 24622 T C | 4.235 | 0.0396 | -0.162              | S:1020     | synonymous       | 17.347    | 0.3235         |
| 1365 T G  | 3.600 | 0.0578 | -0.139              | Orf1a      | P371S            | 5.102     | 0.2000         |
| 15435 A G | 3.571 | 0.0588 | -0.146              | ORF1b:656  | synonymous       | 14.286    | 0.3214         |
| 14408 C T | 2.456 | 0.1171 | 0.224               | ORF1b      | P314 L           | 75.000    | 0.5646         |
| 28854 C T | 2.380 | 0.1229 | 0.138               | N          | S194L            | 36.224    | 0.5915         |
| 241 C T   | 2.320 | 0.1278 | 0.153               | 3'UTR      | NA               | 49.490    | 0.5773         |
| 3037 C T  | 2.273 | 0.1317 | 0.153               | Orf1a:924  | synonymous       | 50.510    | 0.5758         |
| 6633 C T  | 2.273 | 0.1317 | -0.111              | ORF1a      | A 2123 V         | 5.612     | 0.2727         |

**Table S2: List of mutations associated with disease Mortality**

| Mutation  | Chi2  | pValue | Pearson Correlation | Locus      | Type of Mutation | Frequency | Mortality Rate |
|-----------|-------|--------|---------------------|------------|------------------|-----------|----------------|
| 26194 A T | 8.966 | 0.0028 | 0.221               | Orf3a      | T268S            | 6.633     | 0.3846         |
| 6312 C A  | 5.482 | 0.0192 | -0.199              | orf1ab     | T2016K           | 29.082    | 0.0175         |
| 24622 T C | 4.520 | 0.0335 | -0.167              | S:1020     | synonymous       | 17.347    | 0.0000         |
| 28854 C T | 4.369 | 0.0366 | 0.187               | N          | S194L            | 36.224    | 0.1972         |
| 15772 A T | 4.054 | 0.0441 | 0.147               | ORF1b      | S 769 C          | 4.592     | 0.3333         |
| 1707 C T  | 3.420 | 0.0644 | -0.149              | ORF1a      | S481F            | 20.918    | 0.0244         |
| 3037 C T  | 2.826 | 0.0928 | 0.171               | Orf1a:924  | synonymous       | 50.510    | 0.1717         |
| 18877 C T | 2.817 | 0.0933 | 0.177               | Orf1b:1804 | synonymous       | 54.082    | 0.1698         |

|                  |       |        |        |           |            |        |        |
|------------------|-------|--------|--------|-----------|------------|--------|--------|
| <b>1373 C T</b>  | 2.788 | 0.0949 | -0.132 | Orf1a     | C370R      | 18.367 | 0.0278 |
| 23929 C T        | 2.654 | 0.1033 | -0.134 | S:789     | synonymous | 24.490 | 0.0417 |
| 12685 G T        | 2.538 | 0.1111 | -0.125 | Orf1a     | Q4140H     | 17.347 | 0.0294 |
| <b>631 C A</b>   | 2.414 | 0.1203 | -0.122 | Orf1a:122 | synonymous | 16.837 | 0.0303 |
| 2199 TTTA <br>T  | 2.393 | 0.1219 | -0.116 | Orf1a:644 | deletion   | 9.184  | 0.0000 |
| <b>25611 C A</b> | 2.245 | 0.1340 | -0.116 | Orf3a:74  | synonymous | 14.796 | 0.2069 |
| 1947 T C         | 1.895 | 0.1686 | -0.114 | Orf1a     | V561A      | 25.510 | 0.1800 |

**Table S3: List of mutations associated with disease Severity (Co-morbidity)**

| <b>Mutation</b>  | <b>Chi2</b> | <b>p Value</b> | <b>Pearson<br/>Correlation</b> | <b>Locus</b> | <b>Type of<br/>Mutation</b> | <b>Frequency</b> | <b>Severity<br/>Rate</b> |
|------------------|-------------|----------------|--------------------------------|--------------|-----------------------------|------------------|--------------------------|
| <b>26194 A T</b> | 5.571       | 0.018          | 0.237                          | Orf3a        | T268S                       | 9.174            | 1.000                    |
| 10039 C T        | 3.900       | 0.048          | 0.196                          | Orf1a:3258   | synonymous                  | 6.422            | 1.000                    |
| 631 C A          | 3.737       | 0.053          | -0.193                         | Orf1a:122    | synonymous                  | 8.257            | 0.333                    |
| 1373 C T         | 3.737       | 0.053          | -0.193                         | Orf1a        | C370R                       | 8.257            | 0.333                    |
| 27870 G T        | 3.343       | 0.067          | 0.180                          | Orf7b:39     | E39*                        | 5.505            | 1.000                    |

**Table S4: List of mutations associated with disease Mortality (Co-morbidity)**

| <b>Mutation</b>  | <b>Chi2</b> | <b>p Value</b> | <b>Pearson<br/>Correlation<br/>Score</b> | <b>Locus</b> | <b>Type of<br/>Mutation</b> | <b>Frequency</b> | <b>Mortality<br/>Rate</b> |
|------------------|-------------|----------------|------------------------------------------|--------------|-----------------------------|------------------|---------------------------|
| 10870 G T        | 4.880       | 0.027          | 0.218                                    | orf1a        | synonymous                  | 5.607            | 0.500                     |
| 6312 C A         | 4.154       | 0.042          | -0.217                                   | orf1a        | T2016K                      | 19.626           | 0.000                     |
| <b>26194 A T</b> | 4.001       | 0.045          | 0.201                                    | Orf3a        | T268S                       | 9.346            | 0.400                     |
| 17115 T C        | 2.556       | 0.110          | 0.159                                    | Orf1b:1216   | synonymous                  | 7.477            | 0.375                     |
| 12685 G T        | 2.176       | 0.140          | -0.149                                   | Orf1a        | Q4140H                      | 10.280           | 0.000                     |

**Table S5: List of mutations associated with disease Severity (No Co-morbidity)**

| <b>Mutation</b> | <b>Chi2</b> | <b>p Value</b> | <b>Pearson<br/>Correlation<br/>Score</b> | <b>Locus</b> | <b>Type of<br/>Mutation</b> | <b>Frequency</b> | <b>Severity<br/>rate</b> |
|-----------------|-------------|----------------|------------------------------------------|--------------|-----------------------------|------------------|--------------------------|
|-----------------|-------------|----------------|------------------------------------------|--------------|-----------------------------|------------------|--------------------------|

|                   |       |       |        |            |            |       |       |
|-------------------|-------|-------|--------|------------|------------|-------|-------|
| <b>11082 TG T</b> | 5.238 | 0.022 | 0.253  | Orf1a:3606 | L3606F     | 5.747 | 0.800 |
| <b>11595 A G</b>  | 5.238 | 0.022 | 0.253  | Orf1a:3777 | Q3777R     | 5.747 | 0.800 |
| 10870 G T         | 3.797 | 0.051 | -0.219 | Orf1a:3535 | synonymous | 9.195 | 0.000 |
| 5884 C T          | 3.360 | 0.067 | 0.201  | Orf1a:1873 | synonymous | 4.598 | 0.750 |
| 15772 A T         | 3.360 | 0.067 | 0.201  | Orf1b:769  | S769C      | 4.598 | 0.750 |

**Table S6: List of mutations associated with disease Mortality (No Co-morbidity)**

| <b>Mutation</b>   | <b>Chi2</b> | <b>p Value</b> | <b>Pearson Correlation Score</b> | <b>Locus</b> | <b>Type of Mutation</b> | <b>Frequency</b> | <b>Mortality rate</b> |
|-------------------|-------------|----------------|----------------------------------|--------------|-------------------------|------------------|-----------------------|
| <b>11082 TG T</b> | 10.830      | 0.001          | 0.363                            | Orf1a:3606   | L3606F                  | 5.747            | 0.429                 |
| 15772 A T         | 2.737       | 0.098          | 0.182                            | Orf1b:769    | S769C                   | 4.598            | 0.333                 |
| 12312 C T         | 2.737       | 0.098          | 0.182                            | Orf1a:4016   | A4016V                  | 4.598            | 0.250                 |
| <b>11595 A G</b>  | 1.875       | 0.171          | 0.151                            | Orf1a:3777   | Q3777R                  | 5.747            | 0.176                 |
| 27870 G T         | 1.875       | 0.171          | 0.151                            | Orf7b:39     | E39*                    | 5.747            | 0.182                 |

## **STRUCTURAL ANALYSIS**

### **Protein structural analysis of Orf3a and N protein of SARS-CoV-2**

We used the Innovagen's peptide calculator (<https://pepcalc.com/>) to study the effect of mutation on the N protein (Figure 1). It gives information about the molecular weight, net charge at neutral pH, information about solubility in water, and iso-electric point of the peptide. The site becomes polar after S is mutated to L at 194th site along with an increase in molecular weight.

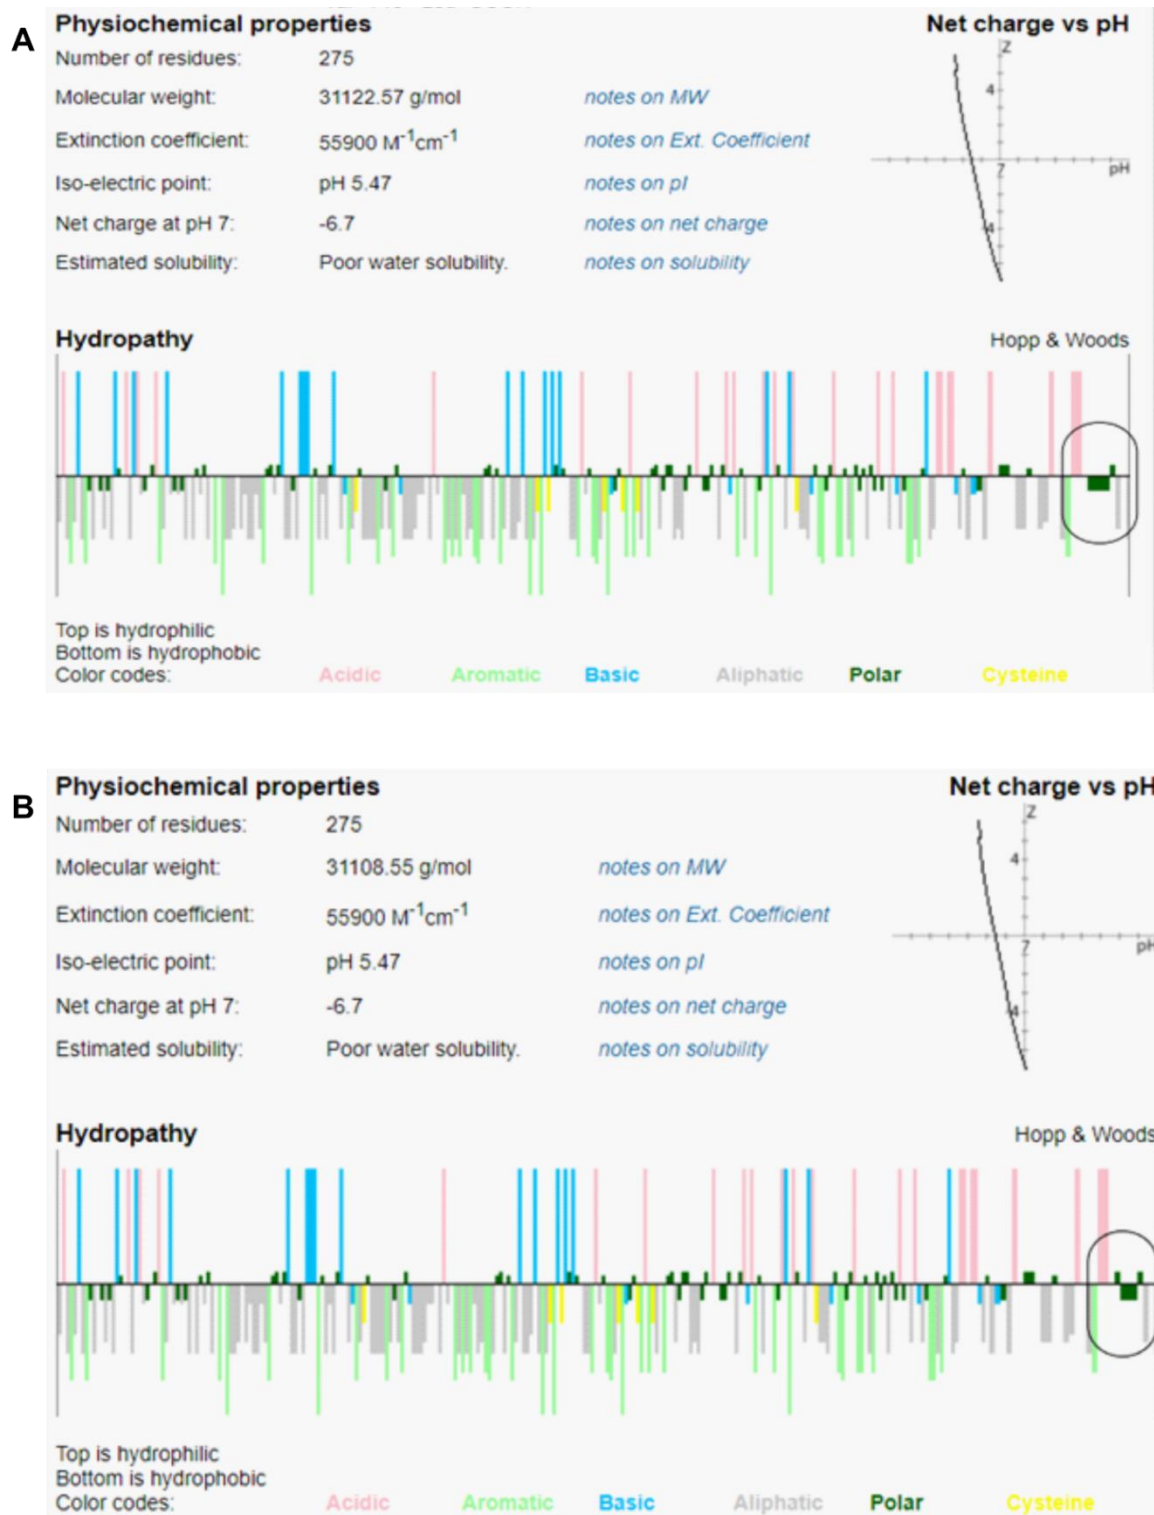

**Figure S1:** The various properties of residues of Orf3a. We used Innovagen's peptide calculator (<https://pepcalc.com/>) for the analysis of the S194L type of mutation associated with 28854 C|U in the N region and compared the effect on the physicochemical properties before(**a**) and after (**b**) the mutation.

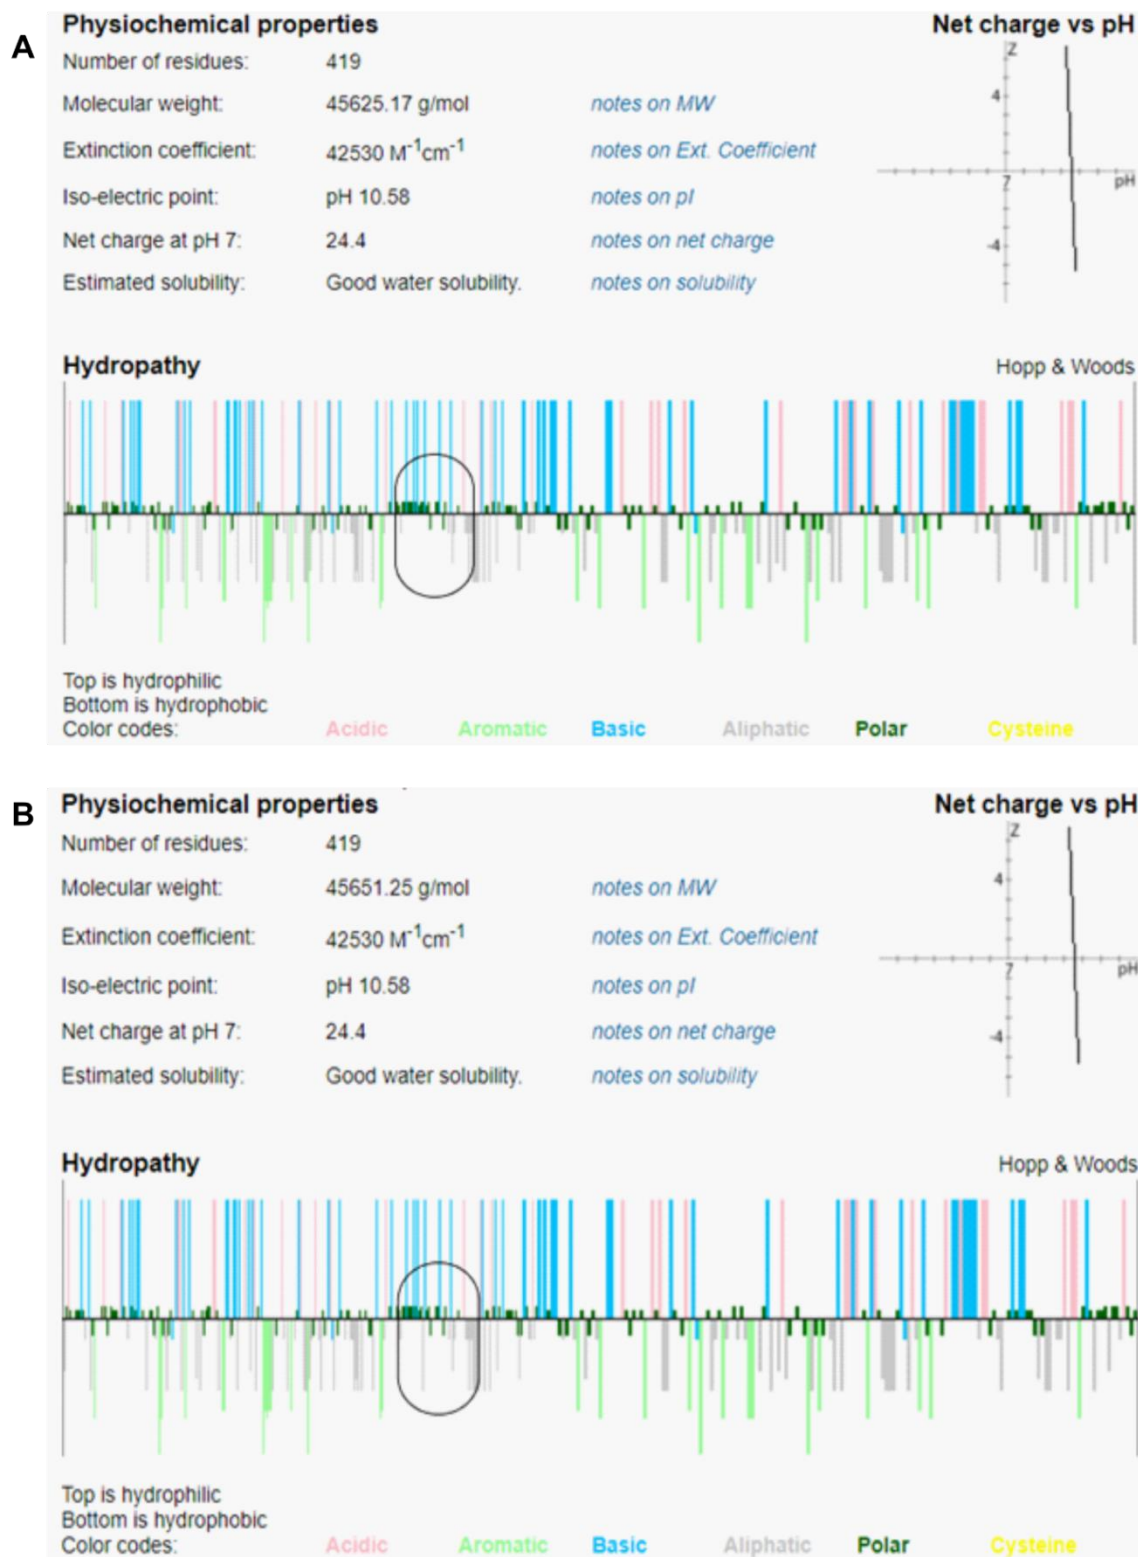

**Figure S2:** The various properties of residues of Orf3a for the T268S type of mutation associated with 26194 A|U in the Orf3a region and compared the effect on the physicochemical properties (a) before and (b) after the mutation.

## Secondary structure of RNA and mutation

We analyzed the secondary structures of the RNA sequences using the RNAfold web server. We compared the effect of mutations on the secondary structure, by comparing the minimum free energy structure predicted by RNAfold before and after the mutation. The two mutations that we took into consideration are 25611 C|A in the Orf3a:74 locus, 28854 C|U in the N region. The 28854 C|U in the N region corresponds to the S194L type of mutation. The study revealed that both mutations led to the change in the secondary MFE structure (Figure 3 and 4).

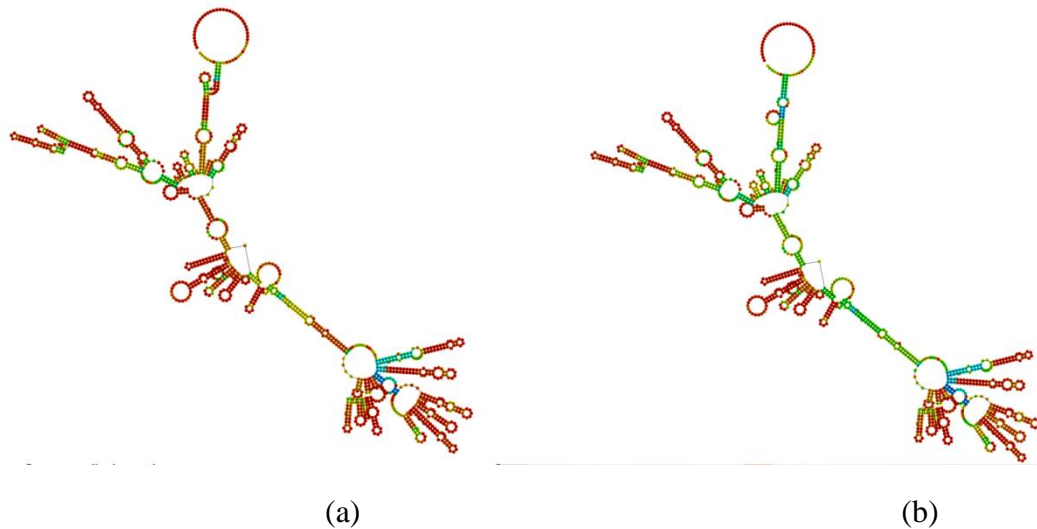

**Figure S3:** Secondary Structure of N region (a) before mutation and (b) when C is mutated to T at 28854th site. Drastic change is observed in the RNA Secondary Structure after the mutation from C to U.

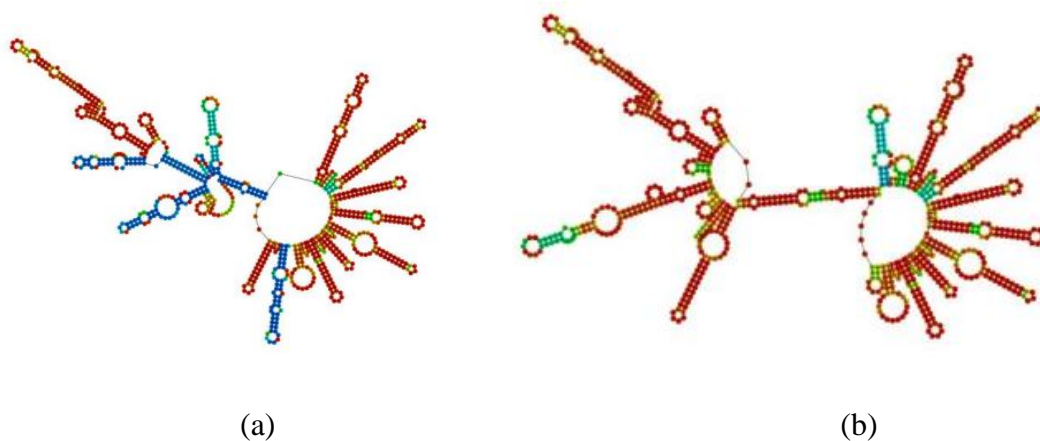

**Figure S4:** MFE secondary structure comparison before (a) and after (b) the mutation at site 25611 from C to A. It can be observed that a drastic change takes place in the secondary structure.
